# Supplementary material for: Determination of trace gastrin and diagnosis of human diseases using CdTe quantum dots labelled gastrin antibodies as phosphorescence sensors
Source: Royal Society of Chemistry journal article supplement (doi:10.1039/c1an15225d), 2011-01-01
Supplement: c1an15225d.pdf [file c1an15225d.pdf]

## Electronic Supplementary Information

### **Determination of trace gastrin and diagnosis of human diseases using the product of CdTe quantum dots labelling gastrin antibody as phosphorescence sensor**

Jia-ming Liu\*, Xiao-mei Huang, Shao-qin Lin, Li-Hong Zhang,

Chang-qing Lin, Zhi-ming Li

<sup>a</sup> Department of Chemistry and Environmental Science, Zhangzhou Normal College,

Zhangzhou, 363000, P.R. China

<sup>b</sup> Department of Food and Biological Engineering, Zhangzhou Institute of Technology,

Zhangzhou, 363000, P.R. China

<sup>c</sup> Department of Biochemistry, Fujian Education College, Fuzhou 350001, P.R. China

### **Supporting Results**

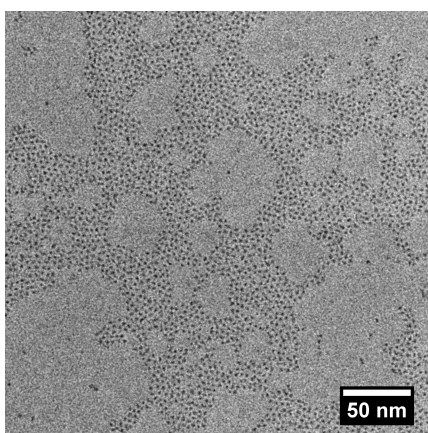

Fig. S1 TEM image of CdTe-QDs

Table S1 Basic parameters of instrument

| Parameters of instrument |                    | The $\Delta I_p$ of the Ab <sub>GAS</sub> -<br>GAS- Ab <sub>GAS</sub> -CdTe-<br>QDs system | The<br>corresponding<br>RSDs of $\Delta I_p$<br>of the system (%) | Optimum |
|--------------------------|--------------------|--------------------------------------------------------------------------------------------|-------------------------------------------------------------------|---------|
| Delay time (ms)          | 0.050, 0.10, 0.30, | 17.9, 24.2, 16.3,                                                                          | 2.5, 2.1, 2.3,                                                    | 0.10    |
|                          | 0.50, 0.70         | 12.9, 10.7                                                                                 | 3.1, 3.5                                                          |         |
| Gate time (ms)           | 1.0, 1.5, 2.0,     | 12.1, 16.5, 25.2,                                                                          | 3.3, 2.3, 2.0,                                                    | 2.0     |
|                          | 2.5, 3.0           | 14.1, 9.8                                                                                  | 3.0, 3.7                                                          |         |
| Cycle time (ms)          | 10, 15, 20,        | 16.2, 20.6, 24.9,                                                                          | 2.5, 2.2, 2.0,                                                    | 20      |
|                          | 25, 30             | 17.5, 14.0                                                                                 | 2.4, 3.5                                                          |         |
| Flash count              | 1, 2, 3,           | 24.3, 19.0, 16.7,                                                                          | 2.1, 2.3, 2.5,                                                    | 1.0     |
|                          | 4, 5               | 12.6, 11.9                                                                                 | 3.4, 3.5                                                          |         |

Table S2 Optimum measurement conditions (C and V are the concentration and volume of solutions, respectively.)

| Condition                                       | Variant                                    | The $\Delta I_p$ of the system  | The corresponding RSDs of $\Delta I_p$ of the system (%) | Optimum      |
|-------------------------------------------------|--------------------------------------------|---------------------------------|----------------------------------------------------------|--------------|
| $C_{\text{CdTe-QDs}}$ ( $\mu\text{g mL}^{-1}$ ) | 4.0, 4.5, 5.0,<br>5.5, 6.0                 | 19.9, 22.2, 23.8,<br>22.5, 21.2 | 2.6, 2.3, 2.1,<br>2.4, 2.5                               | 5.0          |
| CdTe-QDs (mL)                                   | 1.00, 1.50, 2.00,<br>2.50, 3.00            | 19.4, 21.7, 24.3,<br>22.0, 20.7 | 2.9, 3.1, 2.0,<br>2.7, 2.8                               | 2.00         |
| $C_{\text{AbGAS}}$ ( $\mu\text{g mL}^{-1}$ )    | 0.010, 0.050, 0.10,<br>0.25, 0.50          | 10.1, 16.7, 23.9,<br>17.3, 11.9 | 2.7, 2.5, 2.3,<br>2.6, 3.0                               | 0.10         |
| $V_{\text{AbGAS}}$ ( $\mu\text{L}$ )            | 0.10, 0.20, 0.30,<br>0.40, 0.50            | 10.6, 13.3, 18.3,<br>23.5, 12.5 | 2.9, 2.7, 2.5,<br>2.3, 2.4                               | 0.40         |
| Sensitizer                                      | Triton X-100, SDS, PEG,<br>Tween-80, CTMAB | 23.6, 15.4, 14.6,<br>11.4, 10.2 | 2.2, 2.6, 2.7,<br>2.8, 3.2                               | Triton X-100 |
| $C_{\text{Triton X-100}}$ (%)                   | 0.50, 1.0, 1.5,<br>2.0, 2.5                | 14.7, 18.5, 23.4,<br>19.3, 15.1 | 2.6, 2.4, 2.1,<br>2.4, 2.5                               | 1.5          |
| $V_{\text{Triton X-100}}$ (mL)                  | 0.50, 0.75, 1.00,<br>1.50, 2.00            | 13.9, 17.6, 20.8,<br>23.9, 19.7 | 3.0, 2.8, 2.5,<br>2.2, 2.4                               | 1.50         |
| pH                                              | 4.30, 5.60, 7.40,<br>8.10, 9.10            | 13.6, 17.5, 23.2,<br>22.8, 15.5 | 3.1, 2.9, 2.3,<br>2.4, 2.6                               | 7.40         |
| Reaction time (min)                             | 30, 50, 70,<br>90, 120                     | 14.7, 19.4, 21.6,<br>23.5, 19.1 | 3.2, 2.9, 2.7,<br>2.3, 2.5                               | 90           |
| Reaction temperature ( $^{\circ}\text{C}$ )     | 4, 25, 30,<br>37, 40                       | 11.8, 15.3, 20.5,<br>23.1, 18.4 | 3.5, 3.1, 3.0,<br>2.4, 3.3                               | 37           |

|                                                     |                                                       |                   |                |                  |
|-----------------------------------------------------|-------------------------------------------------------|-------------------|----------------|------------------|
| Solid substrate                                     | ACM, PAM, NCM                                         | 17.4, 9.5, 23.4   | 2.9, 3.4, 2.3  | NCM              |
| Ion perturber                                       | Ag <sup>+</sup> , Pb <sup>2+</sup> , I <sup>-</sup> , | 17.9, 23.5, 18.2, | 2.8, 2.2, 2.5, | Pb <sup>2+</sup> |
|                                                     | Cu <sup>2+</sup>                                      | 15.2              | 3.3            |                  |
| C <sub>Pb<sup>2+</sup></sub> (mol L <sup>-1</sup> ) | 0.20, 0.40, 0.80,                                     | 14.0, 17.1, 21.4, | 3.4, 2.9, 2.6, | 1.00             |
|                                                     | 1.00, 1.20                                            | 23.6, 18.1        | 2.3, 3.0       |                  |
| Time for passing N <sub>2</sub> (min)               | 5, 10, 20,                                            | 23.5, 23.8, 23.6, | 2.2, 2.5, 2.3, | 10               |
|                                                     | 30, 40                                                | 23.5, 23.7        | 2.1, 2.5       |                  |
| Time without passing N <sub>2</sub> (min)           | 5, 10, 20,                                            | 21.4, 18.6, 15.1, | 2.4, 3.0, 3.2, |                  |
|                                                     | 30, 40                                                | 11.5, 8.4         | 3.5, 3.7       |                  |
| Drying temperature (°C)                             | 60, 70, 80,                                           | 14.7, 19.7, 21.4, | 2.7, 2.4, 2.0, | 90               |
|                                                     | 90, 95                                                | 24.4, 20.3        | 2.3, 2.4       |                  |
| Drying time (min)                                   | 0.50, 1.0, 1.5,                                       | 14.9, 17, 20.3,   | 2.9, 2.6, 2.5, | 2.0              |
|                                                     | 2.0, 2.5                                              | 23.5, 18.5        | 2.2, 2.4       |                  |
| Standing time (min)                                 | 10, 20, 30,                                           | 22.9, 23.3, 23.5, | 2.4, 2.1, 2.3, | 10-40            |
|                                                     | 40, 50                                                | 23.7, 17.5        | 2.2, 2.5       |                  |
